# Supplementary material for: UiO-66 metal–organic framework-derived ZrO2/ZnO mesoporous materials for high-efficiency detection of NO2 at room temperature
Source: Royal Society of Chemistry journal article supplement (doi:10.1039/d3ta04313d), 2023-01-01
Supplement: d3ta04313d1.pdf [file d3ta04313d1.pdf]

1  
2  
3  
4  
5  
6  
7  
8  
9  
10  
11  
12  
13  
14  
15  
16  
17

## Supplementary Information

### **UiO-66 metal-organic frameworks-derived ZrO<sub>2</sub>/ZnO mesoporous material for high-efficiency detection towards NO<sub>2</sub> at room temperature**

Jinhong Yang<sup>a</sup>, Haoran Peng<sup>a</sup>, Chong Lin<sup>a</sup>, Qingjiang Pan<sup>a</sup>, Lixue Qi<sup>a</sup>, Li Li<sup>\*ab</sup>, and Keying Shi<sup>\*a</sup>

<sup>a</sup> Key Laboratory of Functional Inorganic Material Chemistry, Ministry of Education, School of Chemistry and Material Science, Heilongjiang University, Harbin 150080, P.R. China

<sup>b</sup> College of Modern Agriculture and Ecological Environment, Heilongjiang University, Harbin 150080, P. R. China

**\*Corresponding author**

**Tel.: +86 451 86604920; +86 451 86609141**

**Email: lili1993036@hlju.edu.cn, [shikeying2008@163.com](mailto:shikeying2008@163.com)**

18 **Table S1** Comparison of gas-sensing performance of ZrO<sub>2</sub>, ZnO and other hybrid  
 19 materials to NO<sub>2</sub> gas with previous reports.

| Sensor material                                      | Gas                             | Operating temperature | Gas concentration | Response (s)             | Response time | Recovery time | Detection limit | Ref.             |
|------------------------------------------------------|---------------------------------|-----------------------|-------------------|--------------------------|---------------|---------------|-----------------|------------------|
| SnO <sub>2</sub> -ZrO <sub>2</sub>                   | NO <sub>2</sub>                 | 150°C                 | 10 ppm            | 24.7 <sup>①</sup>        | -             | -             | -               | 1                |
| ZrO <sub>2</sub> -Y <sub>2</sub> O <sub>3</sub> (8%) | H <sub>2</sub>                  | 150°C                 | 1000 ppm          | 7.3 <sup>①</sup>         | 5 s           | 7 s           | -               | 2                |
| In <sub>2</sub> O <sub>3</sub> /ZrO <sub>2</sub>     | C <sub>3</sub> H <sub>6</sub> O | 260°C                 | 100 ppm           | 60.38 <sup>①</sup>       | 1 s           | 38 s          | 10 ppm          | 3                |
| SnO <sub>2</sub> /ZrO <sub>2</sub>                   | TEA                             | 190°C                 | 20 ppm            | 4 <sup>①</sup>           | 1 s           | 1 s           | -               | 4                |
| NiO/ZnO                                              | ethanol                         | 260°C                 | 100 ppm           | 61 <sup>①</sup>          | -             | -             | -               | 5                |
| Ag/ZnO                                               | NH <sub>3</sub>                 | 150°C                 | 10 ppm            | 29.5 <sup>①</sup>        | 13 s          | 20 s          | 10 ppm          | 6                |
| MXene/GO/CuO<br>/ZnO                                 | NH <sub>3</sub>                 | RT                    | 200 ppm           | 96% <sup>②</sup>         | -             | -             | 4.1 ppm         | 7                |
| ZnO/TiO <sub>2</sub>                                 | NO <sub>2</sub>                 | 500°C                 | 50 ppm            | 7.5 <sup>①</sup>         | -             | -             | -               | 8                |
| Al <sub>2</sub> O <sub>3</sub> /ZnO                  | acetylene                       | 120°C                 | 200 ppm           | 96.46% <sup>②</sup>      | -             | -             | 1 ppm           | 9                |
| ZnO/rGO                                              | NO <sub>2</sub>                 | RT                    | 50 ppm            | 9.61 <sup>①</sup>        | 25            | 15            | 5 ppm           | 10               |
| CuO/rGO                                              | NO <sub>2</sub>                 | RT                    | 5 ppm             | 400.8% <sup>②</sup>      | 6.8           | 55.1          | 50 ppb          | 11               |
| Pd-SnO <sub>2</sub> /rGO                             | NO <sub>2</sub>                 | RT                    | 100 ppm           | 7.92 <sup>①</sup>        | 56.9          | 22.1          | 37.8 ppb        | 12               |
| CdS/CuO/rGO                                          | NO <sub>2</sub>                 | RT                    | 10 ppm            | 7.25 <sup>①</sup>        | 45.6          | 14.2          | 50 ppb          | 13               |
| <b>ZnO/ZrO<sub>2</sub></b>                           | <b>NO<sub>2</sub></b>           | <b>RT</b>             | <b>100 ppm</b>    | <b>40.35<sup>①</sup></b> | <b>1.5 s</b>  | <b>42.2 s</b> | <b>50 ppb</b>   | <b>This work</b> |

20 ① :S = R<sub>a</sub>/R<sub>g</sub> or S = R<sub>g</sub>/R<sub>a</sub>

21 ② :S = |R<sub>a</sub>-R<sub>g</sub>|/R<sub>a</sub>×100% or S = |R<sub>g</sub>-R<sub>a</sub>|/R<sub>a</sub>×100%

22

23

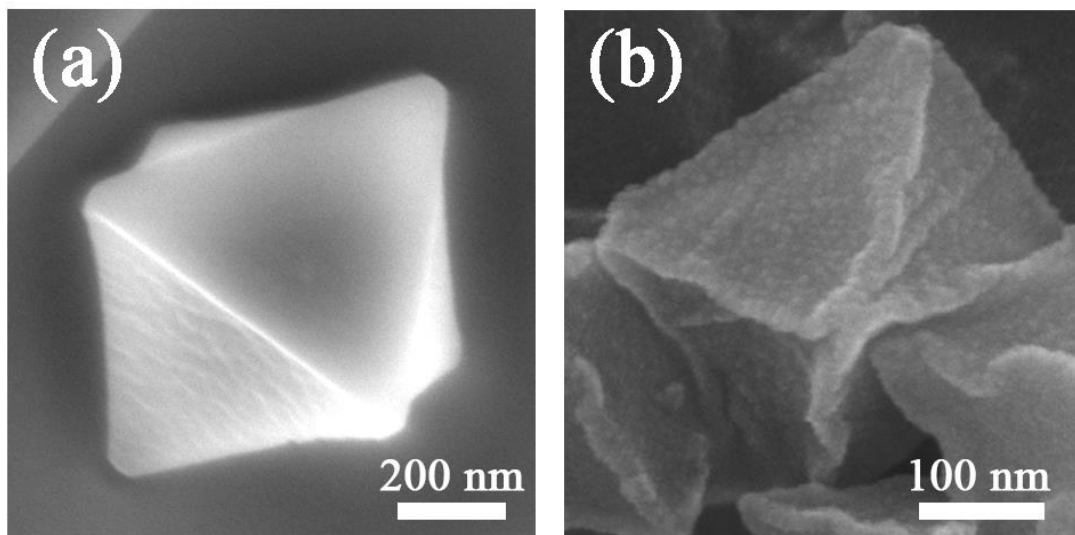

24

25

Fig. S1 (a) SEM images of UiO-66; (b) SEM images of ZrO<sub>2</sub>.

26

27

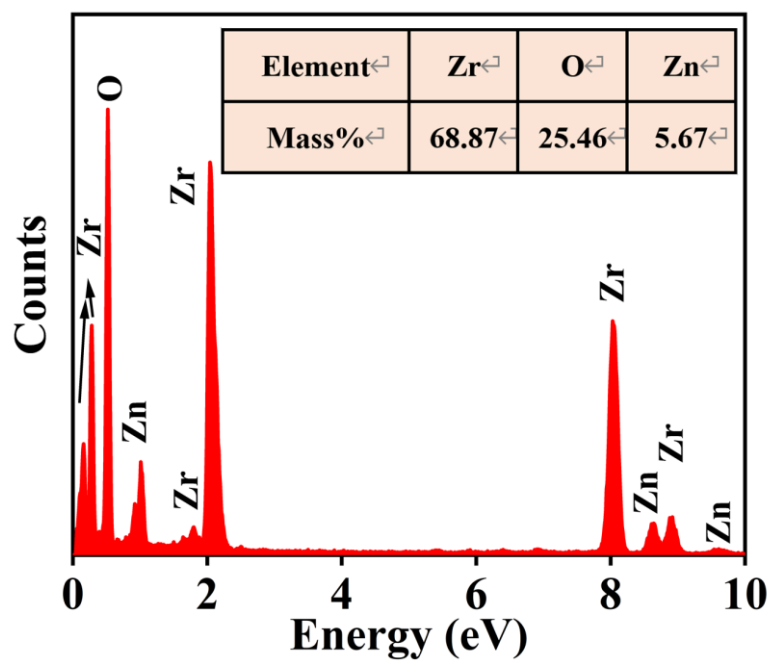

28

29

Fig. S2 EDS analysis of UZZ-2.

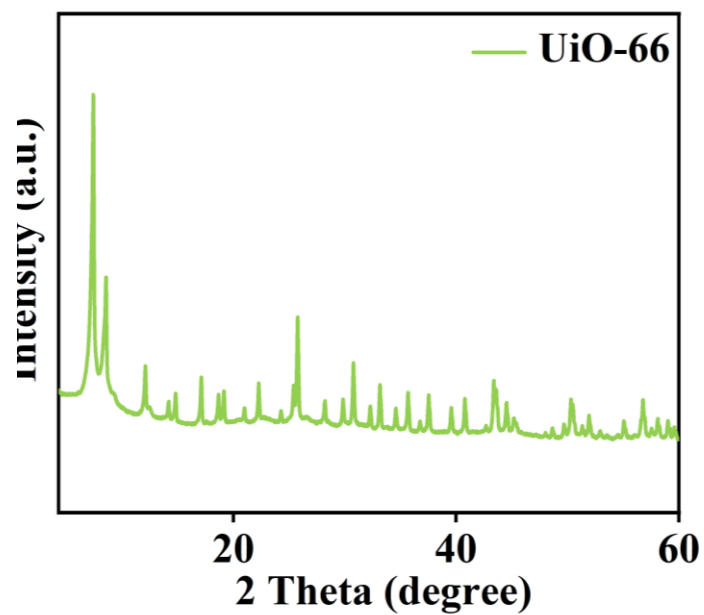

30

31

Fig. S3 PXRD diagram of UiO-66.

32

33

34

35

Fig. S3 shows the PXRD diagram of the metal-organic skeleton UiO-66. Various characteristic peaks of UiO-66 observed at  $7.5^\circ$ ,  $8.6^\circ$ ,  $26^\circ$  and  $31^\circ$  index to the (111), (200), (600) and (731) planes, respectively, consistent with reported literature.<sup>14,15</sup>

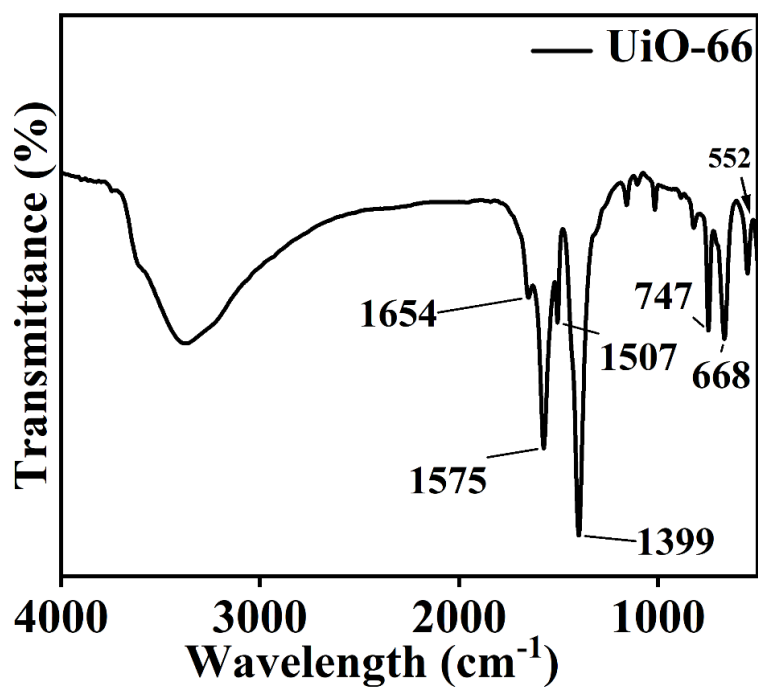

36

37

Fig. S4 FT-IR spectrum of UiO-66.

38 For the original UiO-66 sample, the strong characteristic peak at  $3400\text{ cm}^{-1}$  comes  
39 from the hydroxyl vibrations of the adsorbed  $\text{H}_2\text{O}$  molecules. The peak at  $1654\text{ cm}^{-1}$  is  
40 attributed to the bending vibration of  $-\text{OH}$ , and the two characteristic peaks at  $1575$  and  
41  $1399\text{ cm}^{-1}$  are the symmetric stretching vibration and the asymmetric stretching  
42 vibration of the organic ligand  $\text{O}-\text{C}=\text{O}$ . The characteristic peak at  $1507\text{ cm}^{-1}$  is the  
43 vibrational peak of  $\text{C}=\text{C}$  in the benzene ring, and at about  $747$  and  $668\text{ cm}^{-1}$  are the  
44 vibrational peaks typical of  $\text{C}-\text{H}$  aromatic organic compounds. In addition, the  
45 asymmetric stretching vibration peak of  $\text{Zr}-(\text{OC})$  is at about  $552\text{ cm}^{-1}$ .<sup>16,17</sup>

46

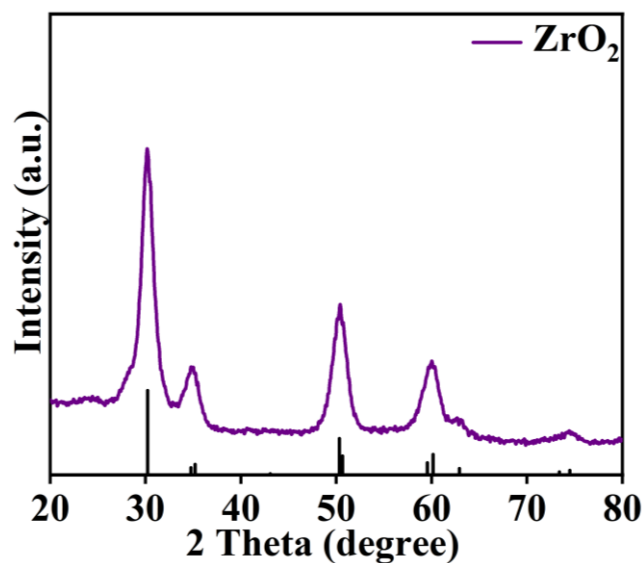

47

48

Fig. S5 XRD diagram of  $\text{ZrO}_2$ .

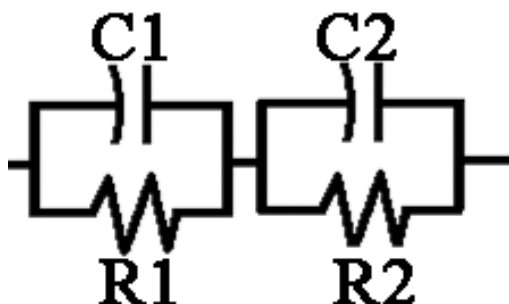

49

50

Fig. S6 Equivalent circuit model for interpreting EIS data.

51 **Table S2** Parameters obtained by fitting the experimental curve to the equivalent circuit.

| Raw materials    | R <sub>1</sub> (Ω)    | C <sub>1</sub> (F)      | R <sub>2</sub> (Ω)    | C <sub>2</sub> (F)      |
|------------------|-----------------------|-------------------------|-----------------------|-------------------------|
| UZZ-2            | 8.367×10 <sup>4</sup> | 9.521×10 <sup>-11</sup> | 1.874×10 <sup>6</sup> | 1.792×10 <sup>-10</sup> |
| UZZ-1            | 2.062×10 <sup>5</sup> | 6.693×10 <sup>-11</sup> | 1.101×10 <sup>7</sup> | 2.341×10 <sup>-10</sup> |
| UZZ-3            | 2.436×10 <sup>5</sup> | 6.447×10 <sup>-11</sup> | 9.455×10 <sup>6</sup> | 3.131×10 <sup>-10</sup> |
| ZrO <sub>2</sub> | 2.436×10 <sup>5</sup> | 6.447×10 <sup>-11</sup> | 9.454×10 <sup>6</sup> | 3.131×10 <sup>-9</sup>  |

52 Where R<sub>1</sub> is the resistance at the electrode/sample interface, C<sub>1</sub> is the associated  
 53 capacitance. R<sub>2</sub> is mainly derived from the conductivity of the sample itself, and C<sub>2</sub> is  
 54 the corresponding associated capacitive property of the material itself.

55

56

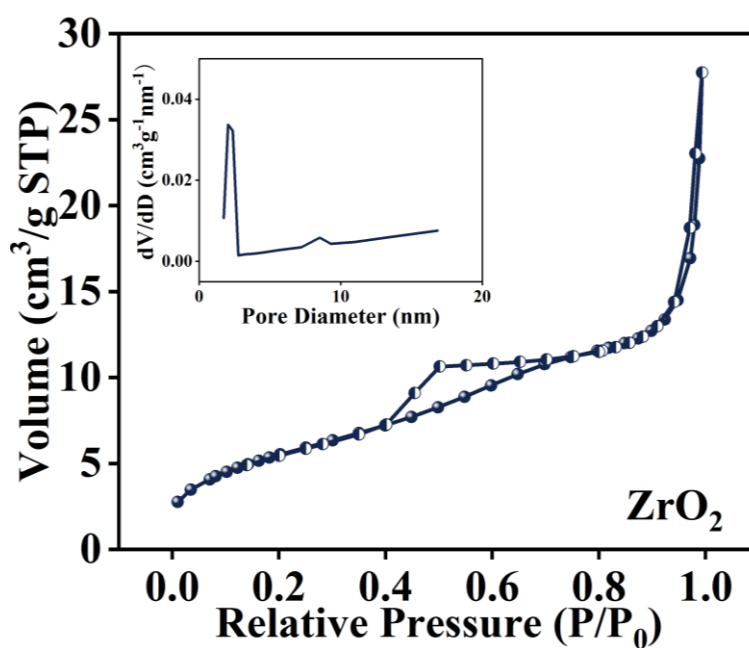

57

58 **Fig. S7** N<sub>2</sub> adsorption-desorption isotherms for pure samples of ZrO<sub>2</sub> (inset shows the pore size distribution curve).

59

60

61

62 **Table S3** Sample BET surface area, average pore size and pore volume.

| Sample           | $S_{\text{set}}$ ( $\text{m}^2 \text{g}^{-1}$ ) | Pore Size (nm) | Pore Volume ( $\text{cm}^3 \text{g}^{-1}$ ) |
|------------------|-------------------------------------------------|----------------|---------------------------------------------|
| ZrO <sub>2</sub> | 20.4676                                         | 9.5330         | 0.0429                                      |
| UZZ-1            | 42.0633                                         | 4.4520         | 0.0606                                      |
| UZZ-2            | 43.3205                                         | 5.8679         | 0.0801                                      |
| UZZ-3            | 28.4719                                         | 6.2261         | 0.0511                                      |

63

64

65

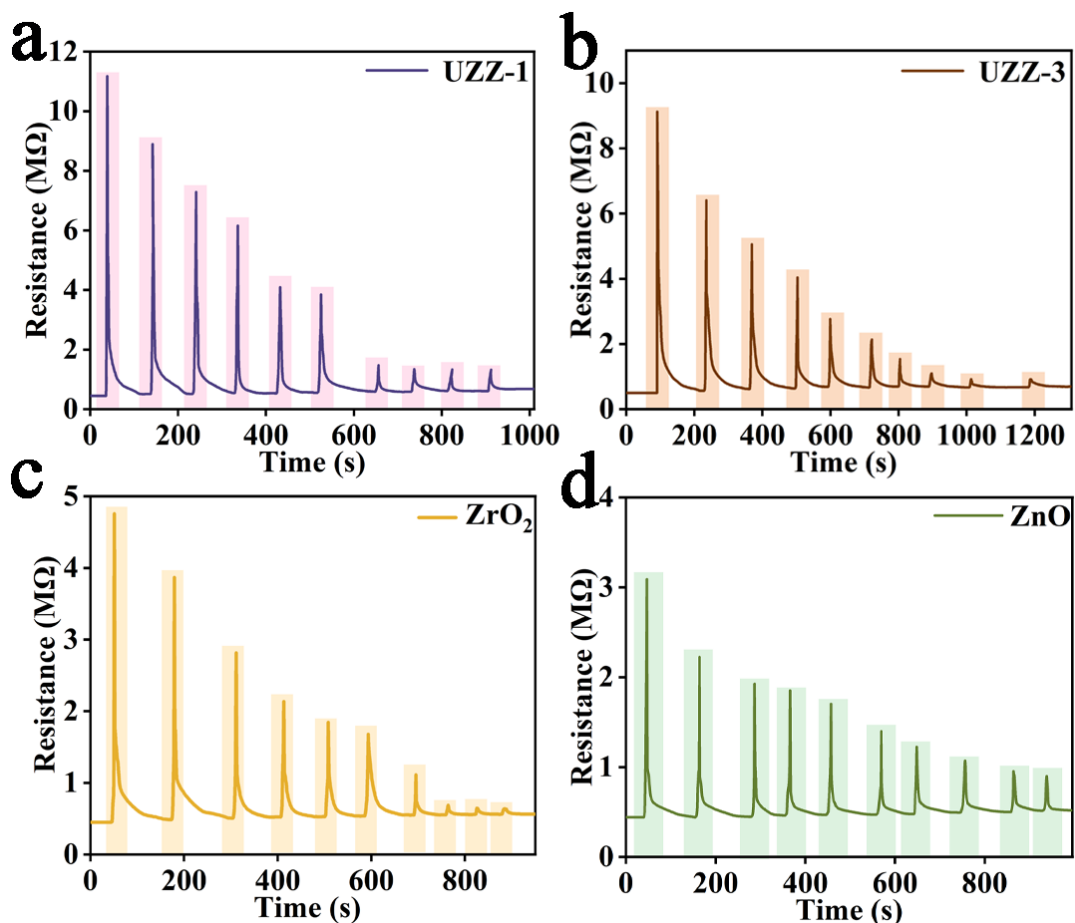

66

67 **Fig. S8** Response curves of (a) UZZ-1; (b) UZZ-3; (c) ZrO<sub>2</sub>; (d) ZnO sensors at room temperature for different

68 concentrations of NO<sub>2</sub>.

69 **Table S4** Response, response time and recovery time of samples at different NO<sub>2</sub> concentrations at room temperature.

| Sample      | UZZ-2                 |       |        | UZZ-1        |       |        | UZZ-3        |       |        | ZrO <sub>2</sub> |       |        | ZnO         |       |        |        |
|-------------|-----------------------|-------|--------|--------------|-------|--------|--------------|-------|--------|------------------|-------|--------|-------------|-------|--------|--------|
|             | NO <sub>2</sub> (ppm) | S     | Tres/s | Trec/s       | S     | Tres/s | Trec/s       | S     | Tres/s | Trec/s           | S     | Tres/s | Trec/s      | S     | Tres/s | Trec/s |
| <b>100</b>  | <b>40.35</b>          | 1.40  | 42.20  | <b>24.84</b> | 4.80  | 77.50  | <b>18.25</b> | 6.40  | 89.40  | <b>10.57</b>     | 7.20  | 98.00  | <b>6.99</b> | 5.30  | 59.20  |        |
| <b>50</b>   | <b>37.39</b>          | 2.30  | 38.50  | <b>17.31</b> | 5.50  | 70.80  | <b>11.07</b> | 6.80  | 60.60  | <b>7.96</b>      | 8.10  | 95.10  | <b>5.02</b> | 6.20  | 56.80  |        |
| <b>30</b>   | <b>34.39</b>          | 3.20  | 36.30  | <b>14.16</b> | 6.90  | 67.20  | <b>8.21</b>  | 7.50  | 54.20  | <b>5.62</b>      | 9.20  | 48.30  | <b>4.17</b> | 7.40  | 38.00  |        |
| <b>10</b>   | <b>27.97</b>          | 4.70  | 32.80  | <b>11.31</b> | 7.60  | 51.30  | <b>6.34</b>  | 7.80  | 43.50  | <b>4.04</b>      | 10.20 | 32.40  | <b>3.99</b> | 8.50  | 36.40  |        |
| <b>5</b>    | <b>22.14</b>          | 6.10  | 29.60  | <b>7.20</b>  | 8.20  | 39.80  | <b>3.86</b>  | 9.50  | 28.80  | <b>3.49</b>      | 15.20 | 30.20  | <b>3.43</b> | 9.20  | 28.50  |        |
| <b>3</b>    | <b>17.63</b>          | 7.30  | 28.30  | <b>6.79</b>  | 10.40 | 36.40  | <b>3.05</b>  | 10.60 | 23.50  | <b>3.12</b>      | 16.10 | 21.30  | <b>2.92</b> | 10.20 | 25.00  |        |
| <b>1</b>    | <b>13.14</b>          | 10.80 | 22.40  | <b>2.49</b>  | 11.60 | 15.00  | <b>2.20</b>  | 13.20 | 21.20  | <b>2.01</b>      | 23.30 | 15.40  | <b>2.53</b> | 10.80 | 23.60  |        |
| <b>0.5</b>  | <b>9.19</b>           | 11.90 | 20.00  | <b>2.24</b>  | 13.40 | 11.40  | <b>1.56</b>  | 15.40 | 19.30  | <b>1.24</b>      | 24.80 | 5.80   | <b>2.12</b> | 11.20 | 21.40  |        |
| <b>0.3</b>  | <b>7.01</b>           | 12.80 | 17.00  | <b>2.11</b>  | 15.20 | 7.60   | <b>1.35</b>  | 17.50 | 6.20   | <b>1.14</b>      | 25.50 | 3.60   | <b>1.90</b> | 15.40 | 18.10  |        |
| <b>0.1</b>  | <b>4.59</b>           | 13.00 | 13.80  | <b>1.47</b>  | 17.30 | 3.30   | <b>1.13</b>  | 19.20 | 4.30   | <b>1.09</b>      | 25.80 | 3.20   | <b>1.73</b> | 16.20 | 13.40  |        |
| <b>0.05</b> | <b>2.69</b>           | 14.70 | 8.50   |              |       |        |              |       |        |                  |       |        |             |       |        |        |

70 \*S:Response      T<sub>res</sub>: Response time      T<sub>rec</sub>: Recovery time



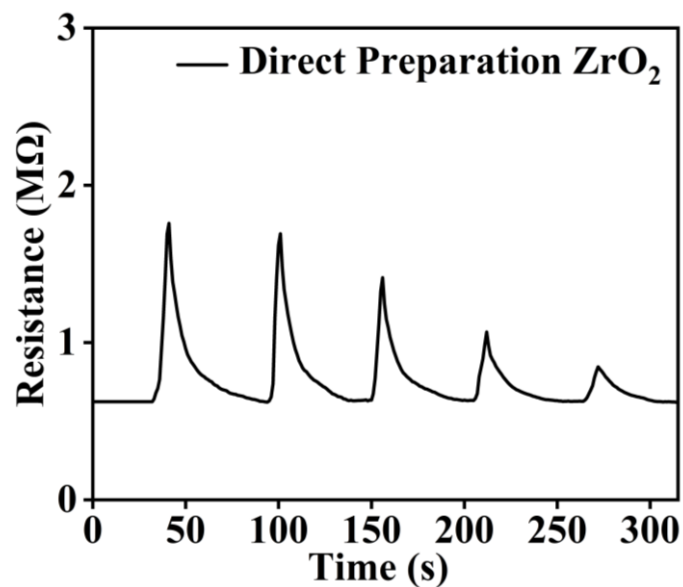

71

72 **Fig. S9** The response curves of directly prepared ZrO<sub>2</sub> sensors towards different concentrations of NO<sub>2</sub> at room  
73 temperature.

74

75

76 **Table S5** Peak position and peak area ratio of XPS O1s for UZZ-2 and UZZ-2+NO<sub>2</sub>  
77 samples (%).

| Sample                 | UZZ-2          |                |                | UZZ-2+NO <sub>2</sub> |                |                |
|------------------------|----------------|----------------|----------------|-----------------------|----------------|----------------|
|                        | O <sub>i</sub> | O <sub>v</sub> | O <sub>c</sub> | O <sub>i</sub>        | O <sub>v</sub> | O <sub>c</sub> |
| Peak                   | O <sub>i</sub> | O <sub>v</sub> | O <sub>c</sub> | O <sub>i</sub>        | O <sub>v</sub> | O <sub>c</sub> |
| Binding energy<br>(eV) | 530.7          | 531.5          | 532.7          | 530.8                 | 531.7          | 532.8          |
| Peak area ratio<br>(%) | 41.2           | 33.2           | 25.6           | 22.7                  | 30.1           | 47.2           |

78

79

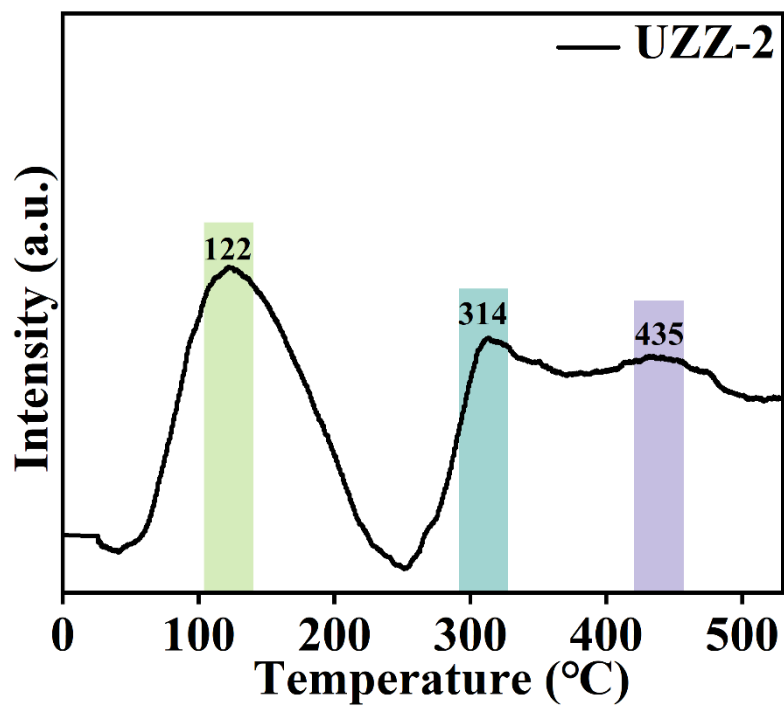

80

81

Fig. S10 NO<sub>2</sub>-TPD of UZZ-2.

82

83

84

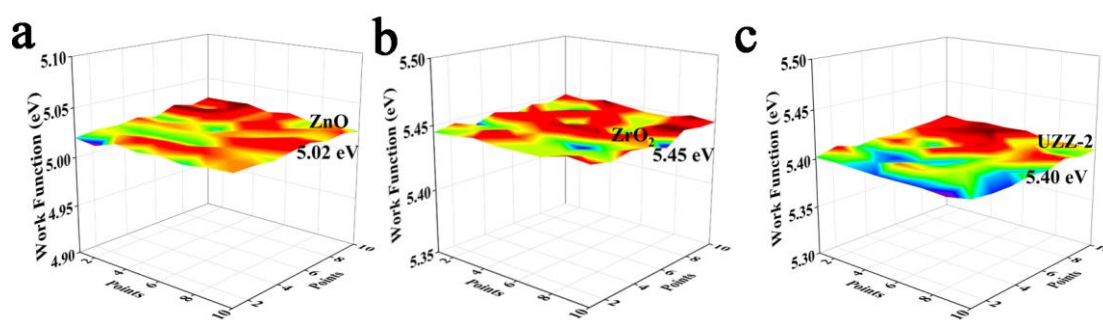

85

86

Fig. S11 Kelvin probe test of (a) ZnO; (b) ZrO<sub>2</sub>; (c) UZZ-2.

87

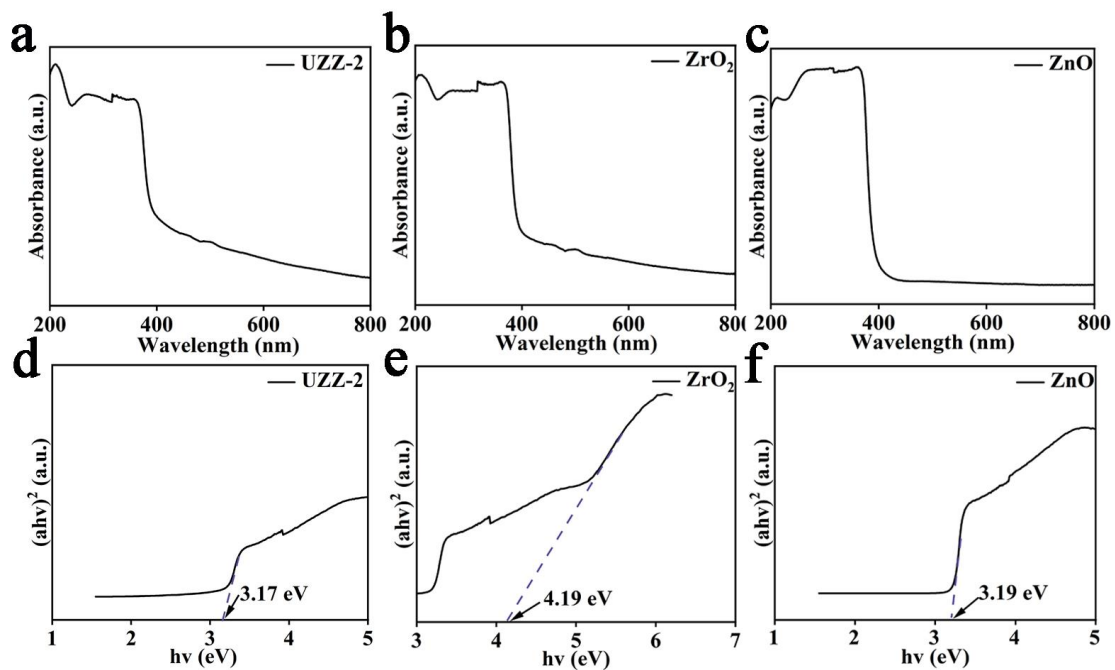

88

89 **Fig. S12** (a-c) UV-vis absorption spectra of UZZ-2, ZrO<sub>2</sub> and ZnO; (d-f) Tauc plots of UZZ-2, ZrO<sub>2</sub> and ZnO. (The

90 energy value at the intersection of the tangent line and the horizontal axis is the band gap width).

91

92

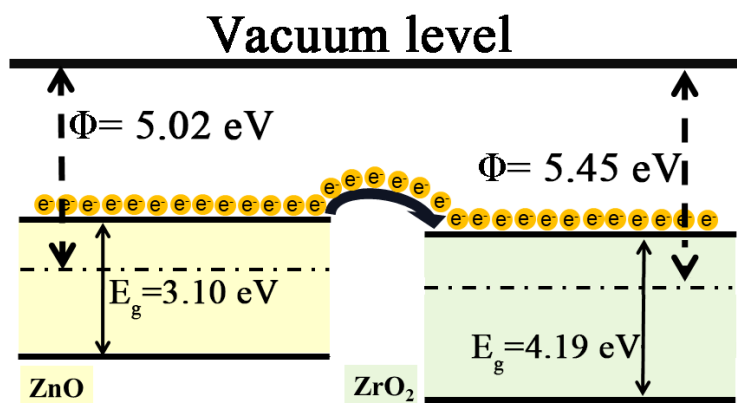

93

94 **Fig. S13** Schematic diagram of the work function of ZnO and ZrO<sub>2</sub>.

95

96

97

98

99 **References**

- 100 1. J. H. Bang, N. Lee, A. Mirzaei, M. S. Choi, H. Choi, H. Jeon, S. S. Kim and H. W. Kim, *Sens.*  
101 *Actuator B-Chem.*, 2020, **319**.
- 102 2. A. Ferlazzo, C. Espro, D. Iannazzo, K. Moulaei and G. Neri, *International Journal of*  
103 *Hydrogen Energy*, 2022, **47**, 9819-9828.
- 104 3. G. Q. Feng, Y. H. Che, S. H. Wang, S. Q. Wang, J. Hu, J. K. Xiao, C. W. Song and L. L. Jiang,  
105 *Sens. Actuator B-Chem.*, 2022, **367**.
- 106 4. C. M. Lou, Z. S. Li, C. Yang, X. H. Liu, W. Zheng and J. Zhang, *Sens. Actuator B-Chem.*,  
107 2021, **333**.
- 108 5. L. Zhu, W. Zeng, J. D. Yang and Y. Q. Li, *Materials Letters*, 2018, **230**, 297-299.
- 109 6. R. S. Ganesh, M. Navaneethan, V. L. Patil, S. Ponnusamy, C. Muthamizhchelvan, S. Kawasaki,  
110 P. S. Patil and Y. Hayakawa, *Sens. Actuator B-Chem.*, 2018, **255**, 672-683.
- 111 7. Y. Seekaew, S. Kamlue and C. Wongchoosuk, *Acs Applied Nano Materials*, 2023, **6**, 9008-  
112 9020.
- 113 8. S. H. Kwon, T. H. Kim, S. M. Kim, S. Oh and K. K. Kim, *Nanoscale*, 2021, **13**, 12177-12184.
- 114 9. V. V. Kondalkar, L. T. Duy, H. Seo and K. Lee, *ACS Appl. Mater. Interfaces*, 2019, **11**, 25891-  
115 25900.
- 116 10. Z. Liu, L. Yu, F. Guo, S. Liu, L. Qi, M. Shan and X. Fan, *Applied Surface Science*, 2017, **423**,  
117 721-727.
- 118 11. H. Bai, H. Guo, J. Wang, Y. Dong, B. Liu, Z. Xie, F. Guo, D. Chen, R. Zhang and Y. Zheng,  
119 *Sensors and Actuators B: Chemical*, 2021, **337**.
- 120 12. H. Bai, H. Guo, C. Feng, J. Wang, B. Liu, Z. Xie, F. Guo, D. Chen, R. Zhang and Y. Zheng,  
121 *Applied Surface Science*, 2022, **575**.
- 122 13. F. Guo, C. Feng, Z. Zhang, H. Wu, C. Zhang, X. Feng, S. Lin, C. Xu, B. Zhang and H. Bai,  
123 *Sensors and Actuators B: Chemical*, 2022, **364**.
- 124 14. D. W. Hu, X. J. Song, S. J. Wu, X. T. Yang, H. Zhang, X. Y. Chang and M. J. Jia, *Chinese*  
125 *Journal of Catalysis*, 2021, **42**, 356-366.
- 126 15. X. X. Peng, L. Ye, Y. C. Ding, L. C. Yi, C. Zhang and Z. H. Wen, *Applied Catalysis B-*  
127 *Environmental*, 2020, **260**.
- 128 16. C. Q. Chen, D. Z. Chen, S. S. Xie, H. Y. Quan, X. B. Luo and L. Guo, *ACS Appl. Mater.*  
129 *Interfaces*, 2017, **9**, 41043-41054.
- 130 17. W. Xu, Z. H. Xu, W. X. Yao, L. H. Hu, K. Q. Ding, G. D. Wu, G. M. Xiao and L. J. Gao, *Applied*  
131 *Catalysis a-General*, 2023, **662**.
- 132
